# Supplementary material
Source: PubMed Central journal article supplement (PMC3297477)

**A**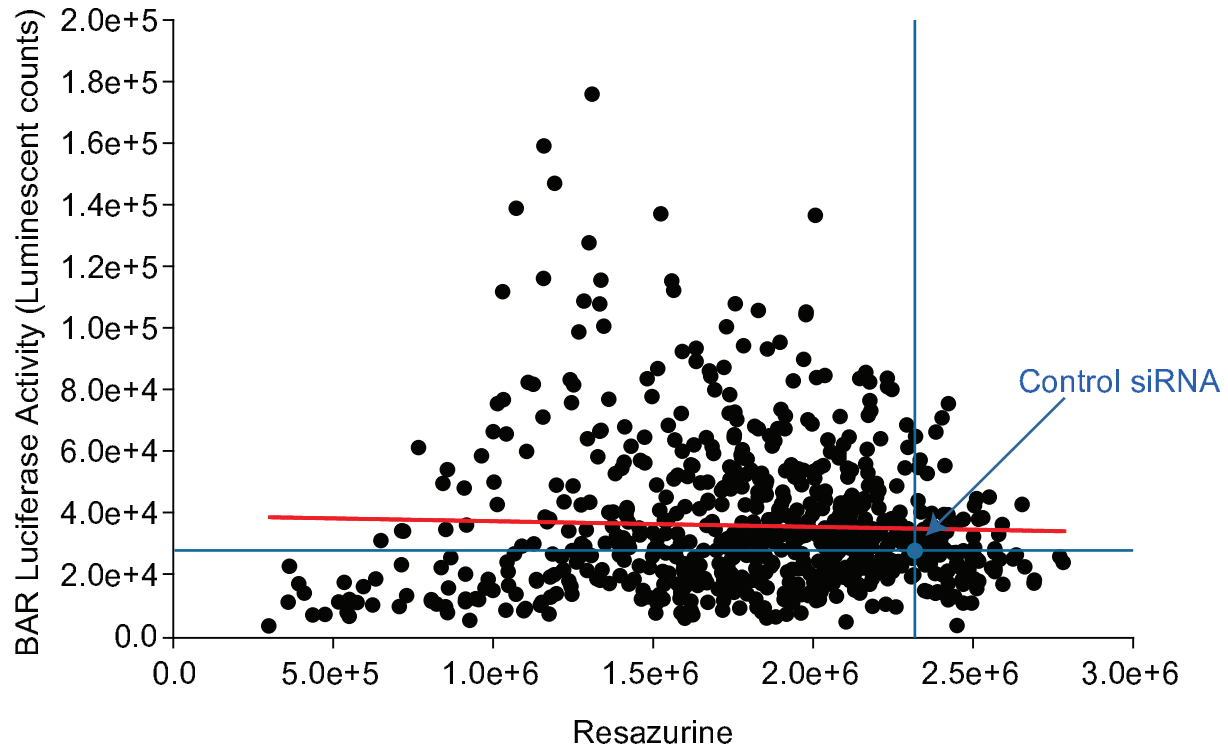**B**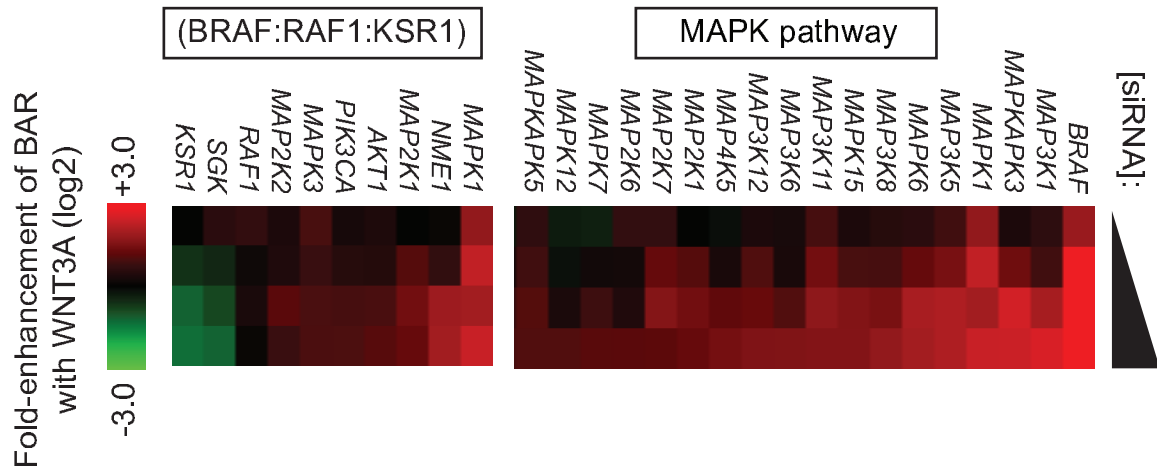

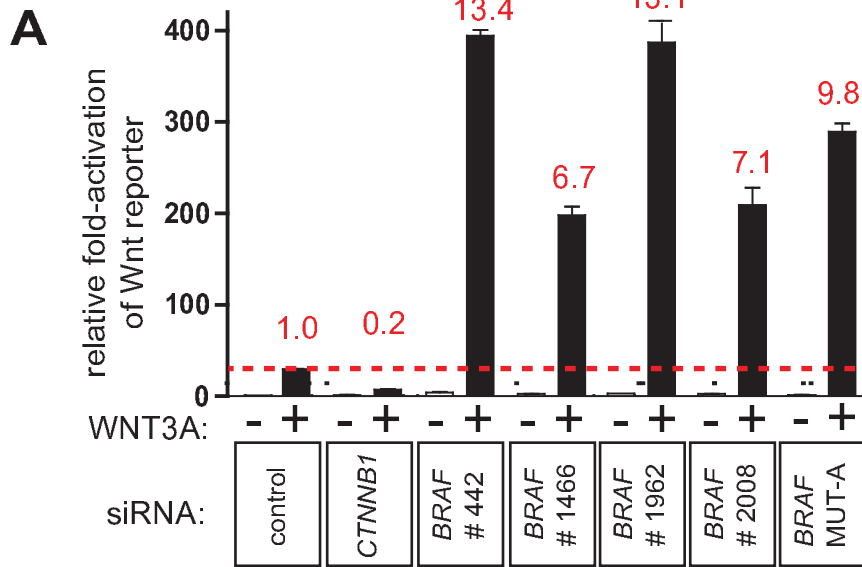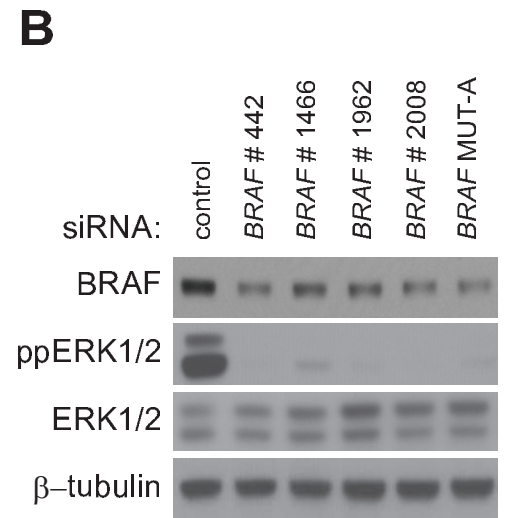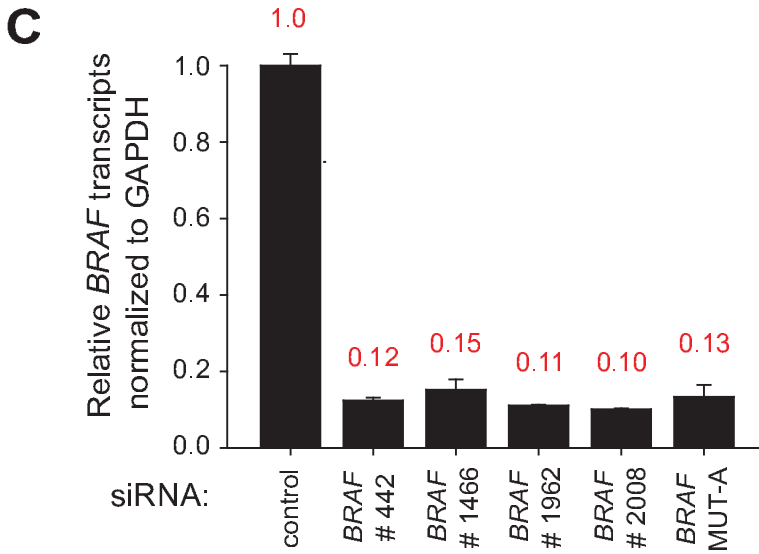

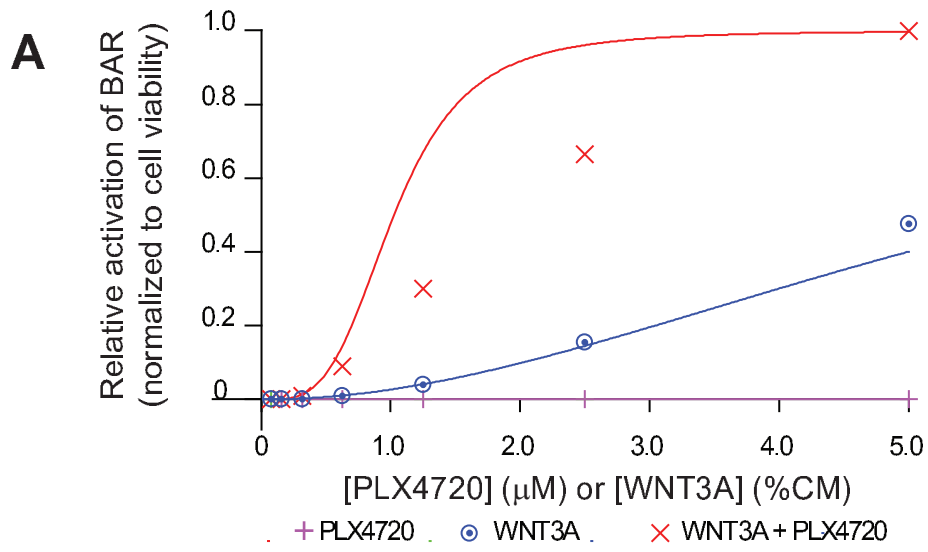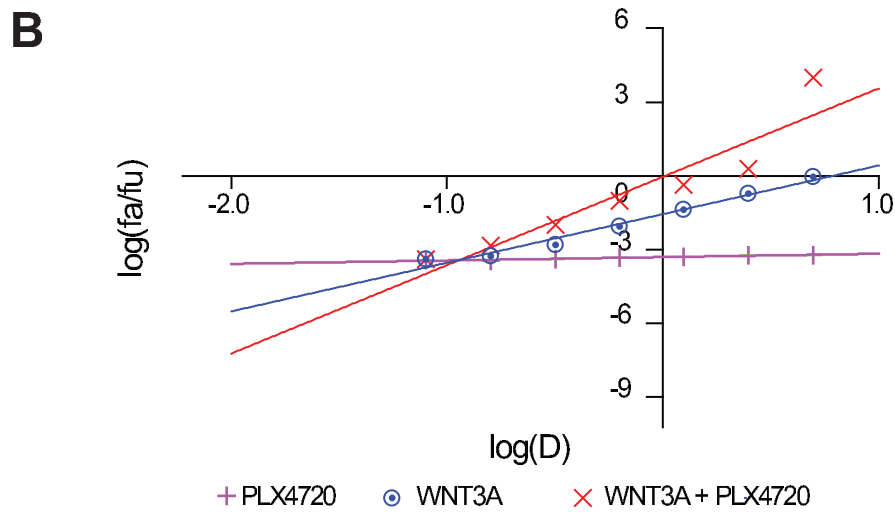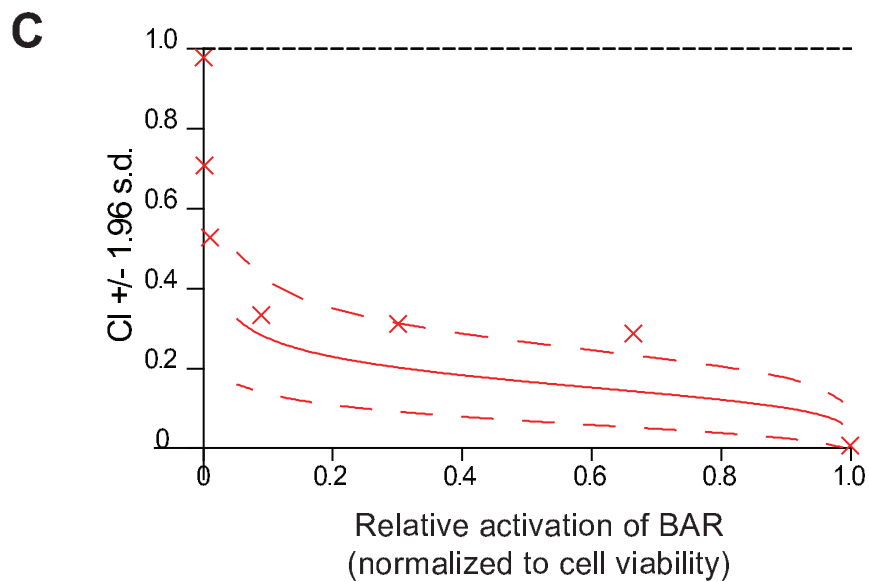

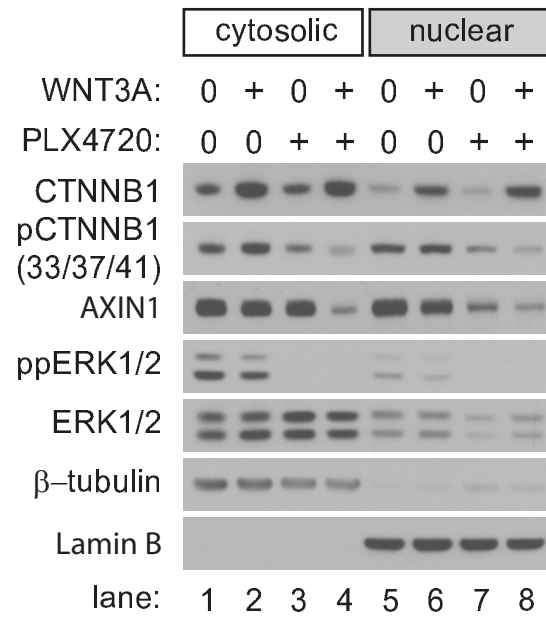

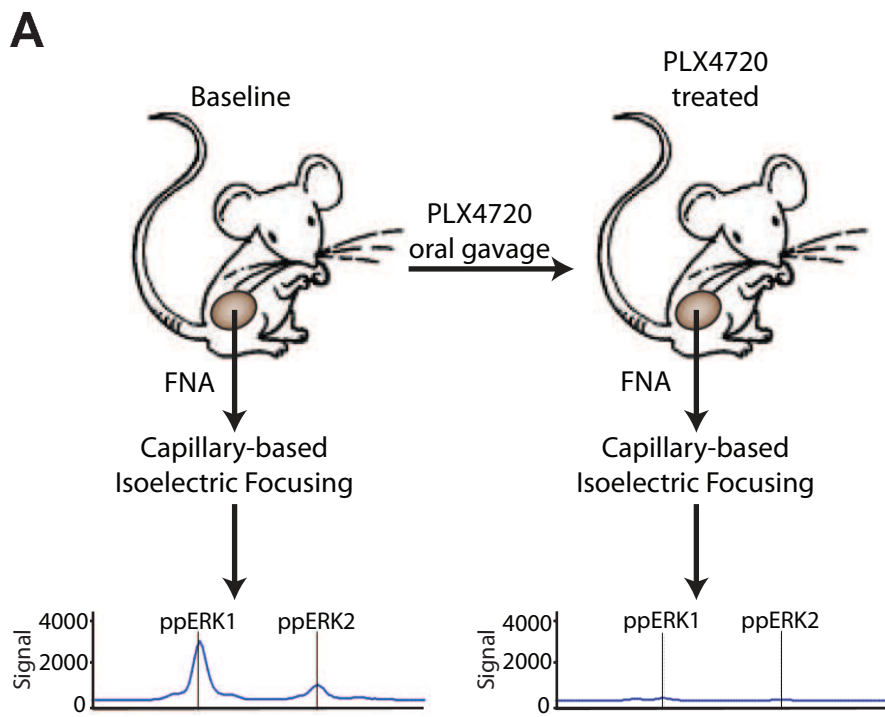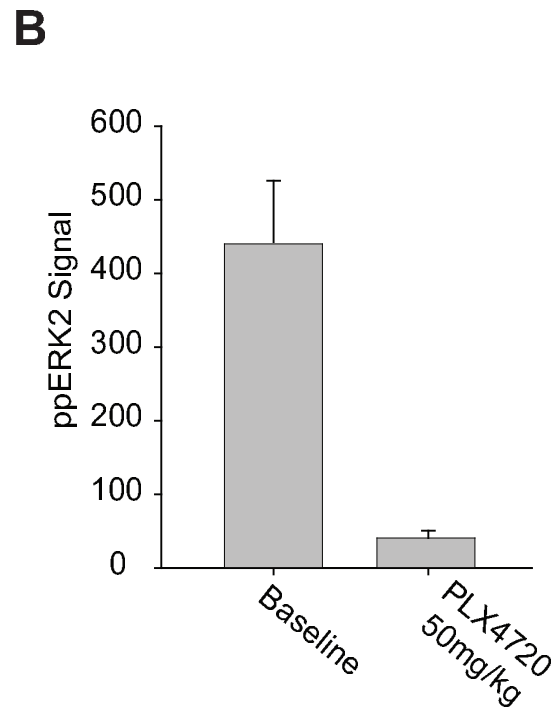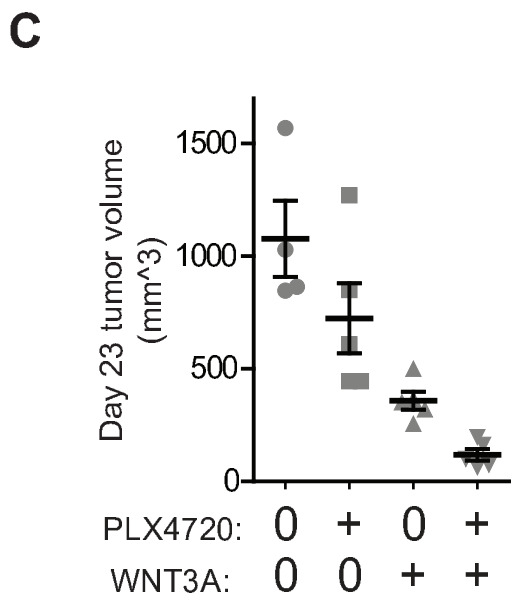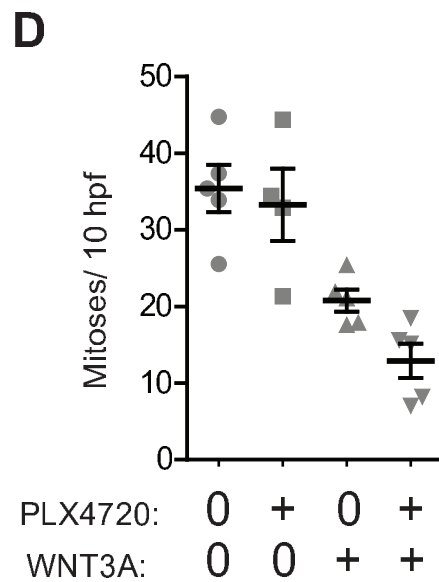

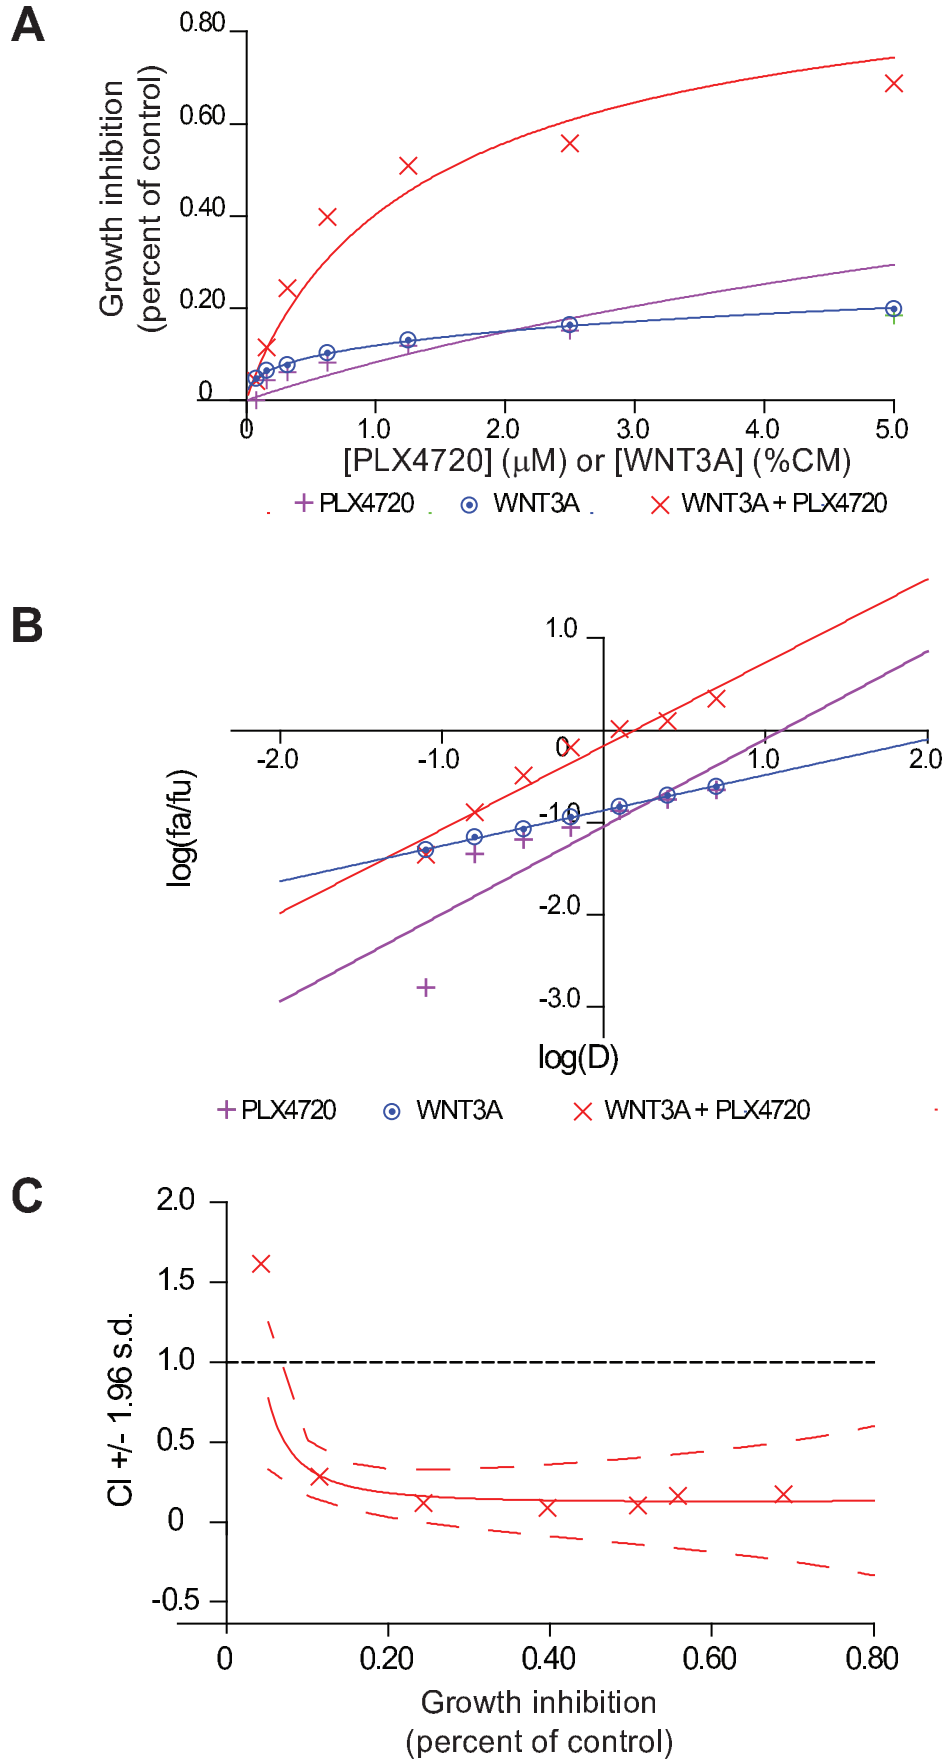

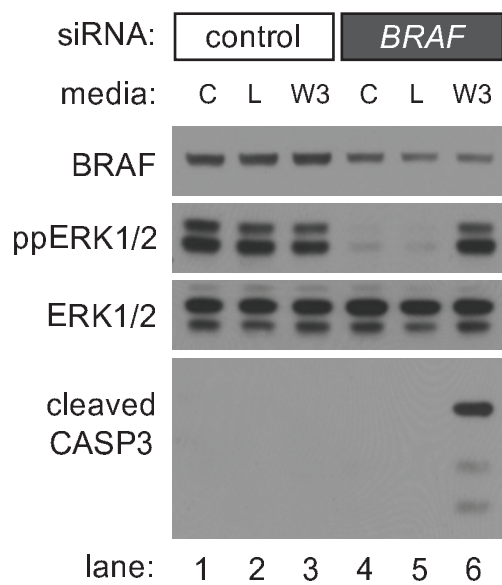

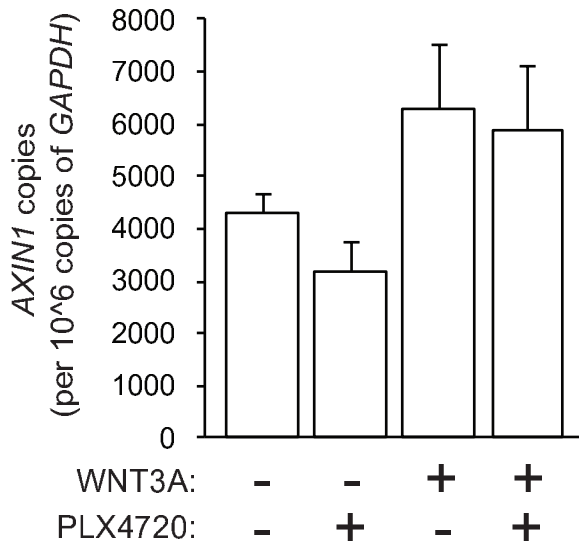



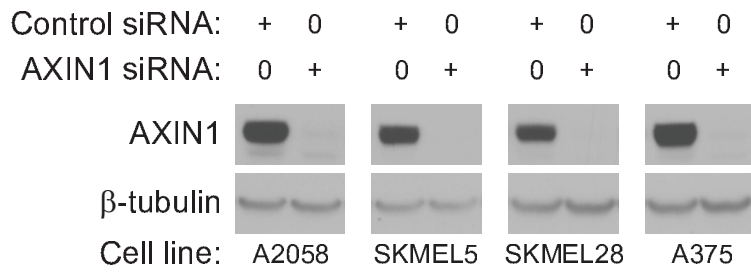

Supplement: NIHMS351700-supplement-Supplemental_Figures.pdf [file NIHMS351700-supplement-Supplemental_Figures.pdf]
